# Supplementary material for: Novel 1,8-naphthalimide derivatives for standard-red organic light-emitting device applications
Source: Royal Society of Chemistry journal article supplement (doi:10.1039/c5tc00409h), 2015-01-01
Supplement: c5tc00409h1.pdf [file c5tc00409h1.pdf]

## Supporting information

### Novel 1,8-naphthalimide derivatives for standard-red organic light-emitting device applications

*Shuai Luo,<sup>‡a</sup> Jie Lin,<sup>‡b</sup> Jie Zhou,<sup>a</sup> Yi Wang,<sup>a</sup> Xingyuan Liu,<sup>\*b</sup> Yan Huang,<sup>a</sup> Zhiyun Lu,<sup>\*a</sup> and Changwei*

*Hu<sup>\*a</sup>*

<sup>a</sup> Key Laboratory of Green Chemistry and Technology (Ministry of Education), College of Chemistry, Sichuan University, Chengdu 610064, PR China;

<sup>b</sup> State Key Laboratory of Luminescence and Applications, Changchun Institute of Optics, Fine Mechanics and Physics, Chinese Academy of Sciences, Changchun 130033, PR China;

<sup>‡</sup> These authors contributed equally;

\*E-mail: liuxy@ciomp.ac.cn; luzhiyun@scu.edu.cn; changwei@scu.edu.cn.

### Contents

- 1) **Figure S1** Lippert-Mataga plots of **Nap1~3**.
- 2) **Figure S2** Cyclic voltammograms of **Nap1~3**.
- 3) **Figure S3** UV-Vis absorption spectra of **Nap1~3** in  $5 \times 10^{-5}$  M acetonitrile solutions.
- 4) **Figure S4** EL spectra of devices **I**, **II** and **III** under different driving current densities.
- 5) **Figure S5** Current efficiency-current density characteristics of devices **I**, **II**, and **III**.
- 6) <sup>1</sup>H NMR, <sup>13</sup>C NMR, FT-IR and HRMS spectra of **Nap1~3**.

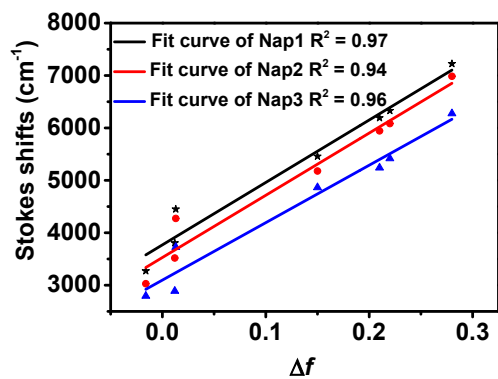

**Figure S1** Lippert-Mataga plots of the wave number of the Stokes shifts ( $\Delta\nu$ ) of **Nap1~3** versus solvent polarity parameter ( $\Delta f = f(\epsilon) - f(n^2)$ ).

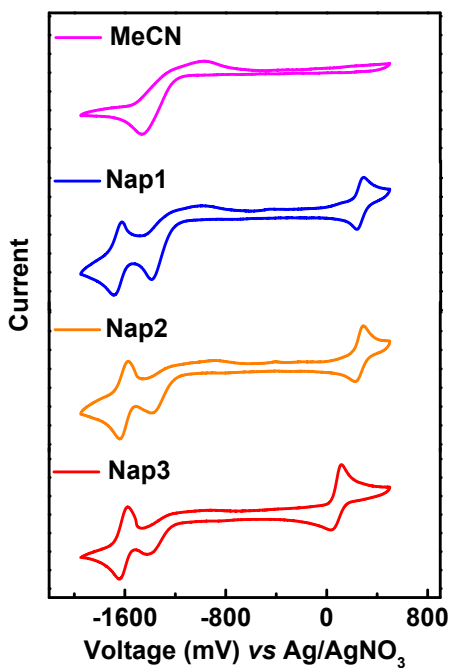

**Figure S2** Cyclic voltammograms of blank MeCN solution and **Nap1~3** solution samples. The oxidation and reduction potentials were determined relative to  $\text{Ag}/\text{Ag}^+$  in  $5 \times 10^{-4}$  M acetonitrile solutions, using  $\text{Fc}/\text{Fc}^+$  as external reference.

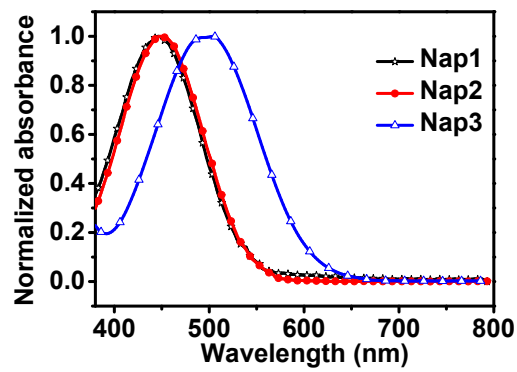

Figure S3 Normalized absorption spectra of Nap1~3 in  $5 \times 10^{-5}$  M acetonitrile solutions.

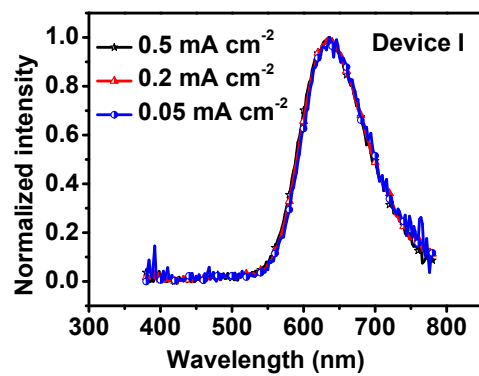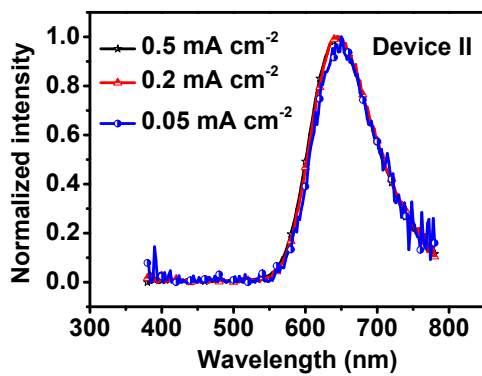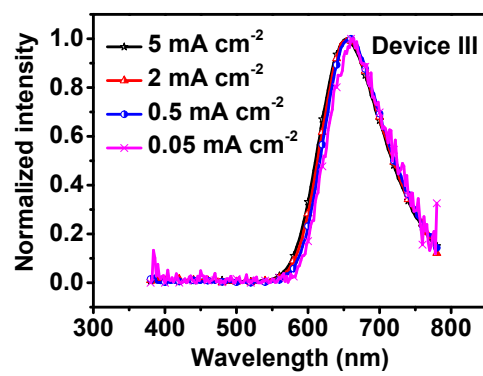

Figure S4 EL spectra of devices I , II and III under different driving current densities.

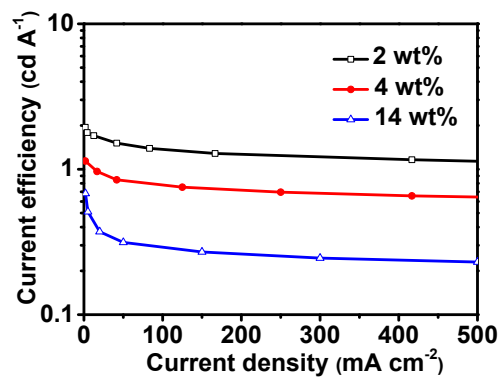

Figure S5 Current efficiency-current density characteristics of devices I, II, and III.

$^1\text{H}$  NMR,  $^{13}\text{C}$  NMR, FT-IR and HRMS spectra of Nap1~3.

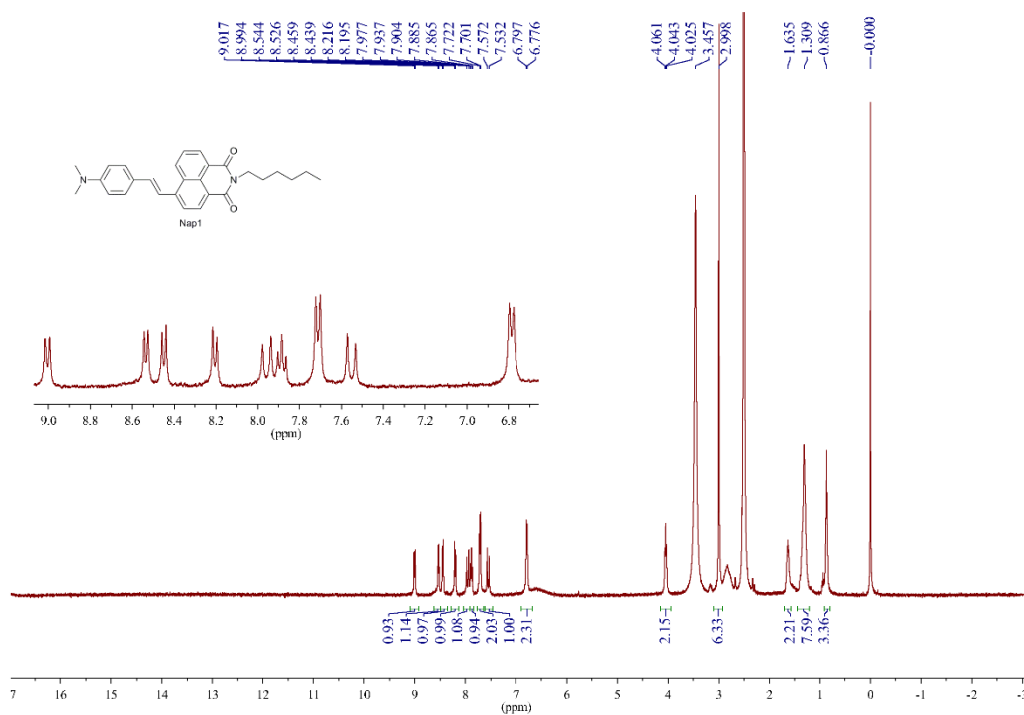

$^1\text{H}$  NMR spectrum of Nap1.

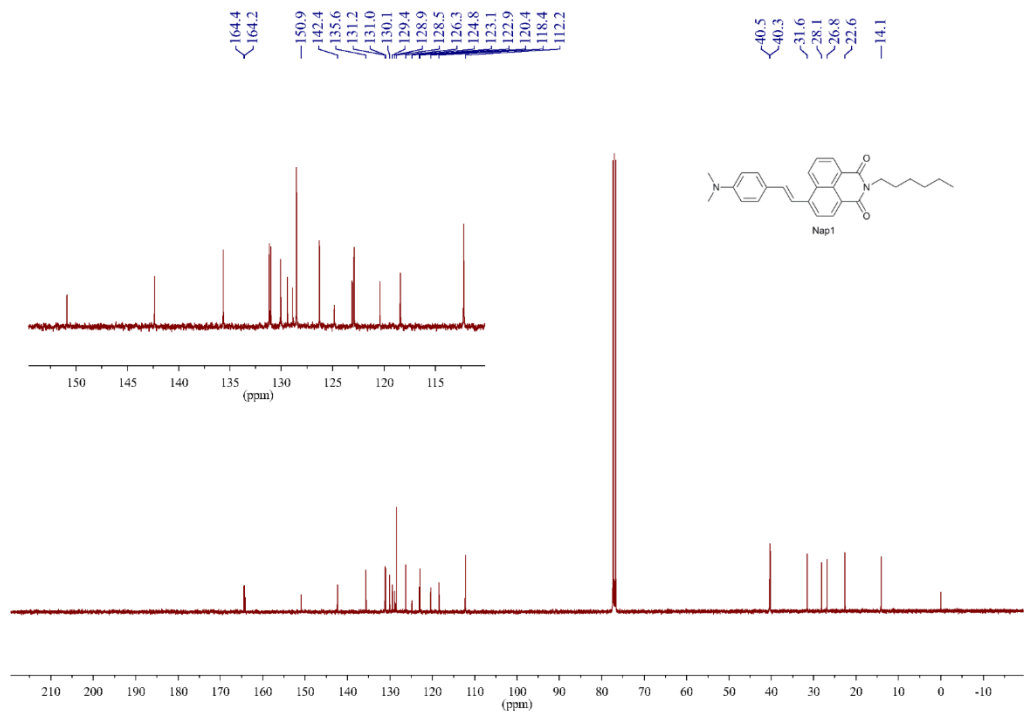

$^{13}\text{C}$  NMR spectrum of Nap1.

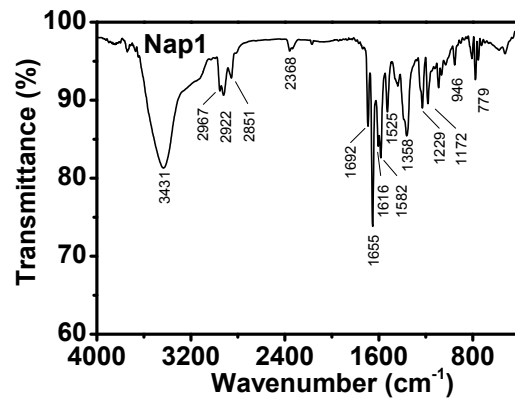

FT-IR spectrum of **Nap1**

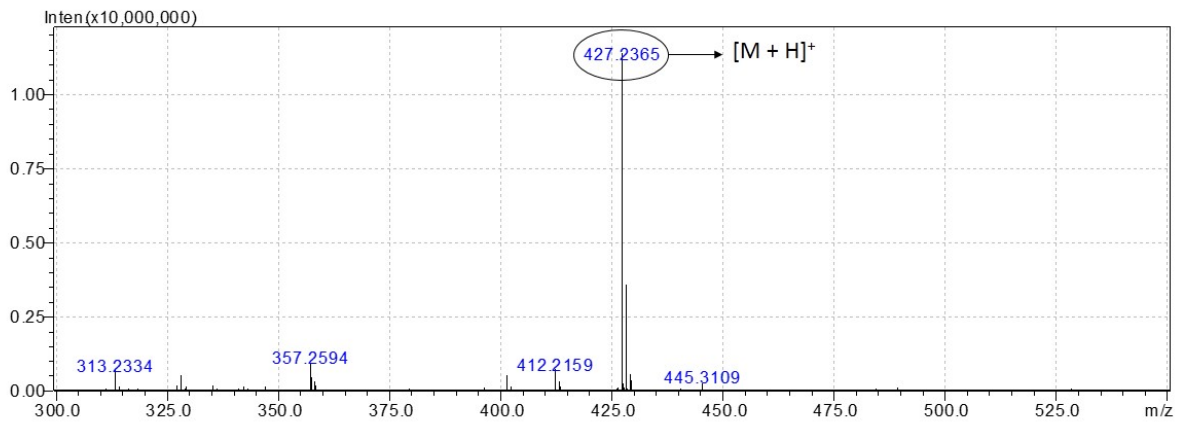

HRMS spectrum of **Nap1**.

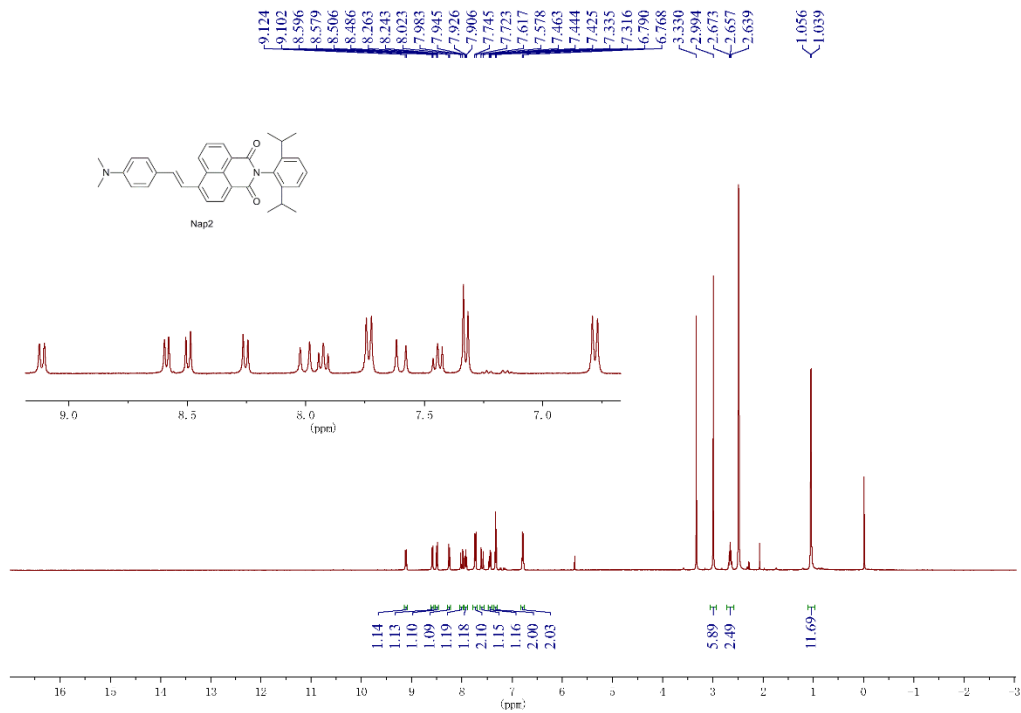

**<sup>1</sup>H NMR spectrum of Nap2.**

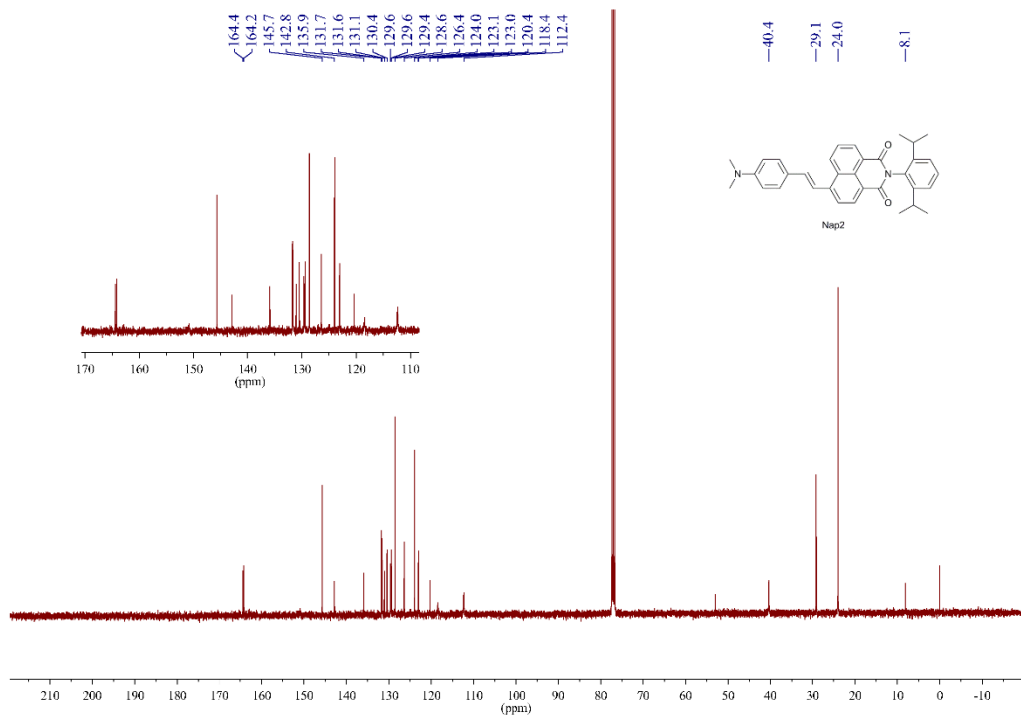

**<sup>13</sup>C NMR spectrum of Nap2.**

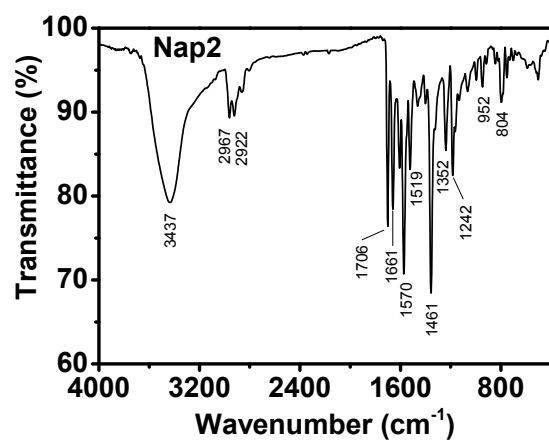

FT-IR spectrum of Nap2.

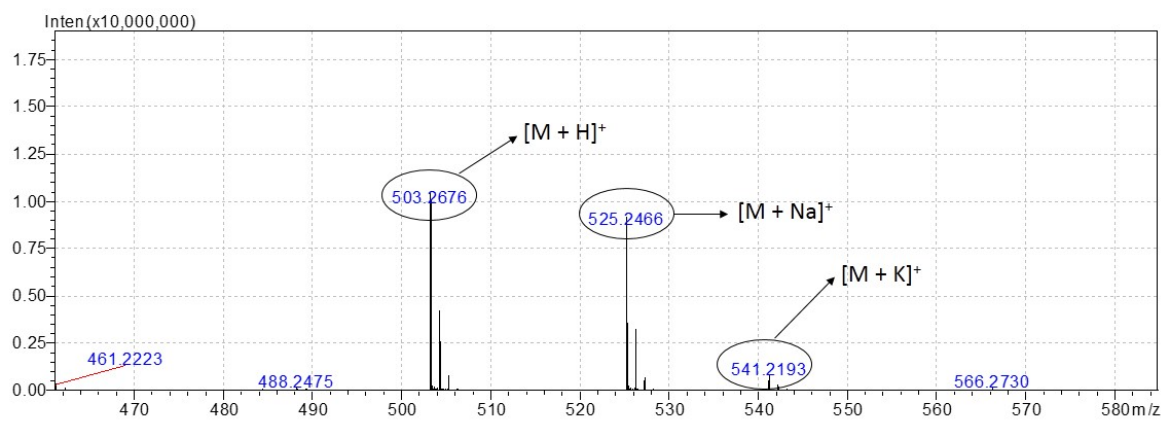

HRMS spectrum of Nap2.



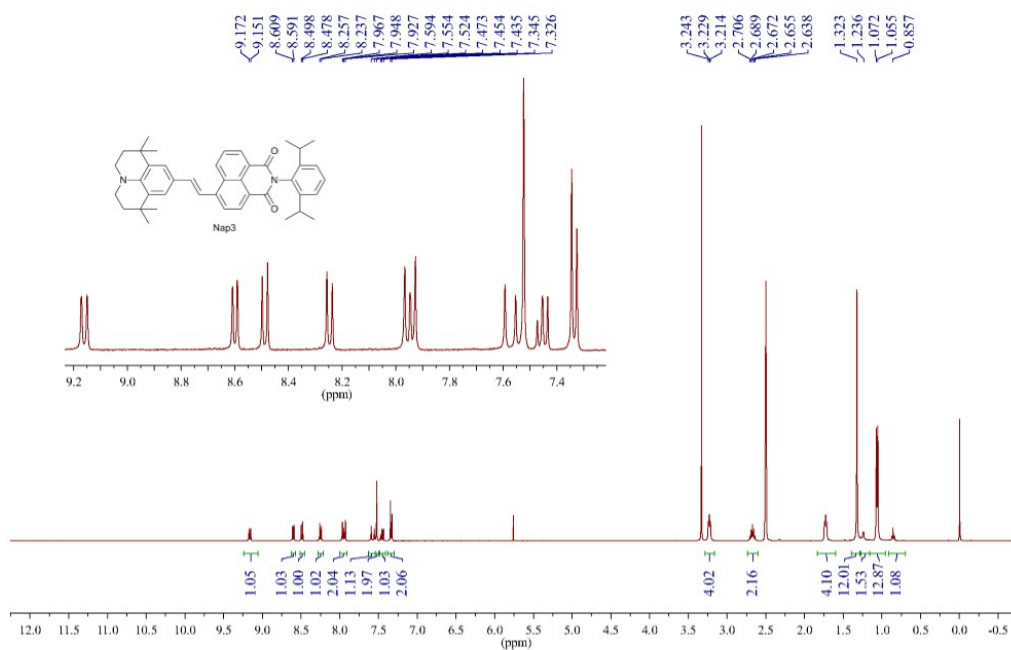

**<sup>1</sup>H NMR spectrum of Nap3.**

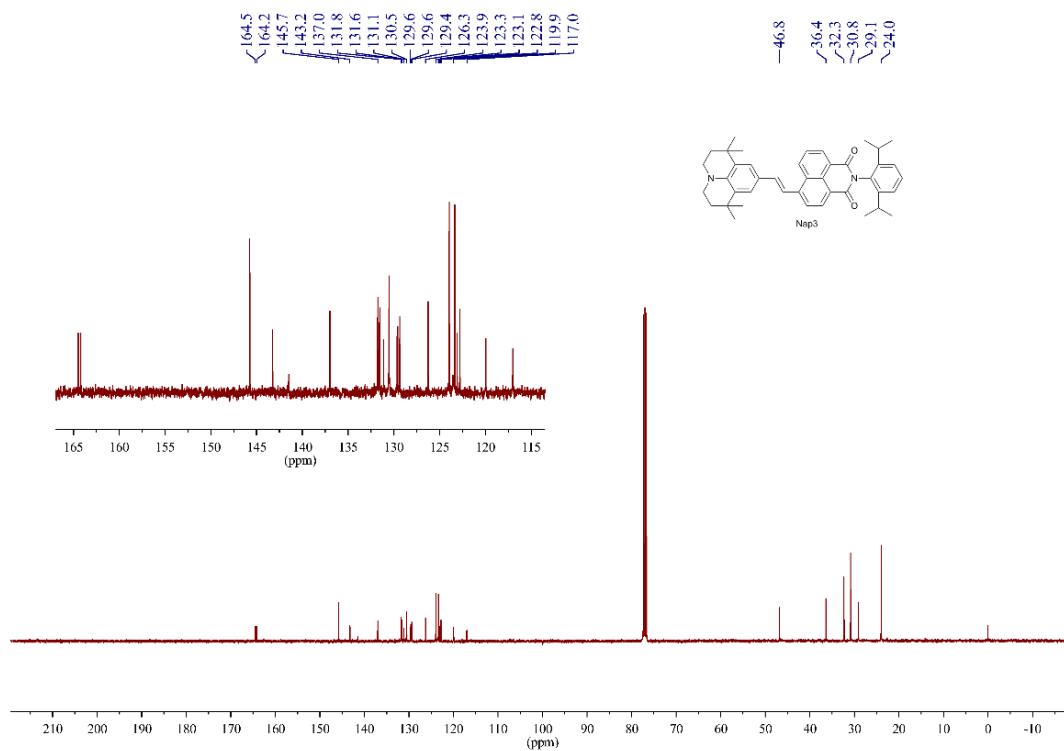

**<sup>13</sup>C NMR spectrum of Nap3.**

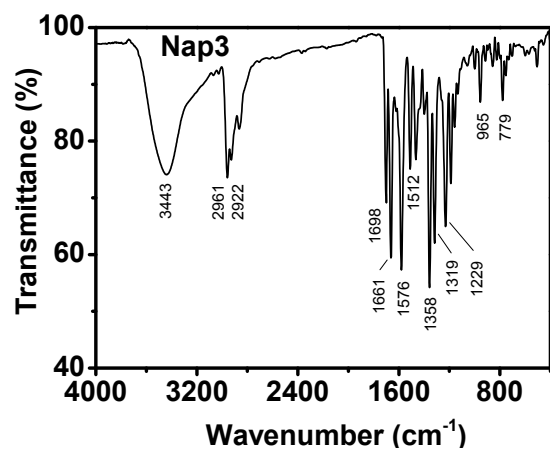

FT-IR spectrum of Nap3.

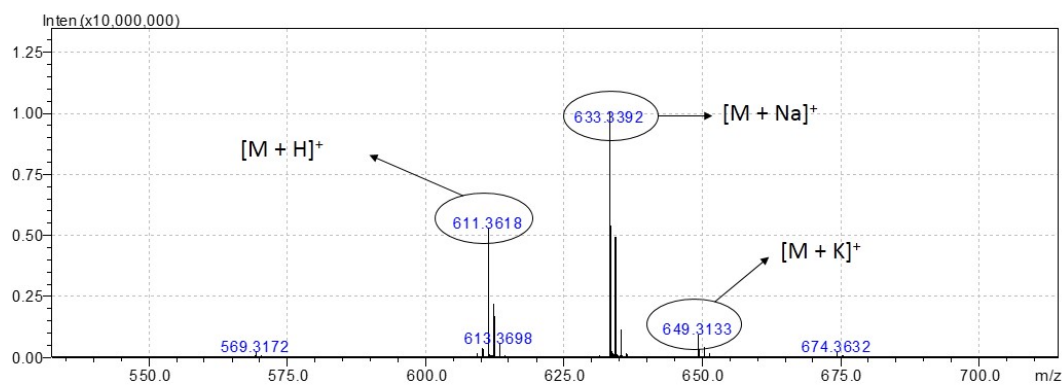

HRMS spectrum of Nap3.
